# Supplementary material for: Action Categorization in Rhesus Monkeys: discrimination of grasping from non-grasping manual motor acts
Source: PubMed Central journal article supplement (PMC5678109; doi:10.1038/s41598-017-15378-6), 2017-11-08
Supplement: 41598_2017_15378_MOESM1_ESM.pdf [file 41598_2017_15378_MOESM1_ESM.pdf]

**Action Categorization in Rhesus Monkeys: discrimination of grasping from non-grasping manual motor acts.**

Koen Nelissen<sup>1,\*</sup> and Wim Vanduffel<sup>1,2</sup>

<sup>1</sup>Laboratory for Neuro- & Psychophysiology, Department of Neurosciences, KU Leuven, Leuven, 3000, Belgium.

<sup>2</sup>Massachusetts General Hospital, Harvard Medical School, Athinoula A. Martino's Center for Biomedical Imaging, Charlestown, Massachusetts, 02129, USA.

\*corresponding author:

Koen Nelissen

Laboratory for Neuro- & Psychophysiology

Department of Neurosciences, KU Leuven

Herestraat 49, 3000 Leuven, Belgium.

Email: [koen.nelissen@kuleuven.be](mailto:koen.nelissen@kuleuven.be)

Phone: ++32-016-330208

## **Supplementary material**

**Supplementary Video S1: Grasping motor act.**

**Supplementary Video S2: Finger touch front motor act.**

**Supplementary Video S3: Mimicked grasp motor act.**

**Supplementary Video S4: Fist touch motor act.**

**Supplementary Video S5: Finger touch side motor act.**

**Supplementary Video S6: Monkey using pliers.**
